# Supplementary material
Source: Springer Nature journal article supplement (https://www.springermedizin.de/resource/supplementary/12911_2012_600_MOESM3_ESM.pdf/9525934)
Supplement: MOESM3 [file 9525934]

# Log data

| Patient | Date       | Item   | quantity |
|---------|------------|--------|----------|
| a       | 2011/10/01 | Drug-a | 2        |
| a       | 2011/10/01 | Drug-b | 3        |
| a       | 2011/10/02 | Drug-a | 2        |
| b       | 2011/10/01 | Drug-b | 3        |
| b       | 2011/10/02 | Drug-c | 4        |

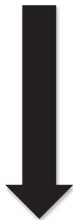

# Patient data

| Patient | Drug-a |          |      | Drug-b |          |      |
|---------|--------|----------|------|--------|----------|------|
|         | Yes/No | quantity | days | Yes/No | quantity | days |
| a       | Yes    | 4        | 2    | Yes    | 3        | 1    |
| b       | No     |          |      | Yes    | 3        | 1    |
